# Supplementary material
Source: Springer Nature journal article supplement (https://www.springermedizin.de/resource/supplementary/12891_2013_1950_MOESM3_ESM.docx/9508872)
Supplement: MOESM3 [file 9508872]

| **Chart 2. Distribution of evaluation times according to variables** | | | | | |
| --- | --- | --- | --- | --- | --- |
|  | **T0** | **T1** | **T2** | **T3** | **T4** |
| **1RM** | X |  |  |  | X |
| **PPT** | X | X | X | X | X |
| **CK** | X | X | X | X | X |
| **TNF-α** | X | X | X | X | X |
| **Cortisol** | X | X |  |  |  |
